# Supplementary material for: Transgenerational Transcriptomic and DNA Methylome Profiling of Mouse Fetal Testicular Germline and Somatic Cells after Exposure of Pregnant Mothers to Tributyltin, a Potent Obesogen
Source: MDPI journal article supplement (doi:10.3390/metabo12020095), 2022-01-20

## Figure S1. Principal Component Analyses (PCA) of RNA-seq and MBD-seq data.

PCA of RNA-seq (**a**, **b**) and MBD-seq (**c**, **d**) are presented as 3-D (**a**, **b**) or 2-D (**c**, **d**) plots. For RNA-seq, all data from F1 and F3 generations are combined and presented for (**a**) generations and testicular cell types or (**b**) exposure. MBD-seq data of the testicular somatic cells are presented for (**c**) F1 and (**d**) F3 generations.

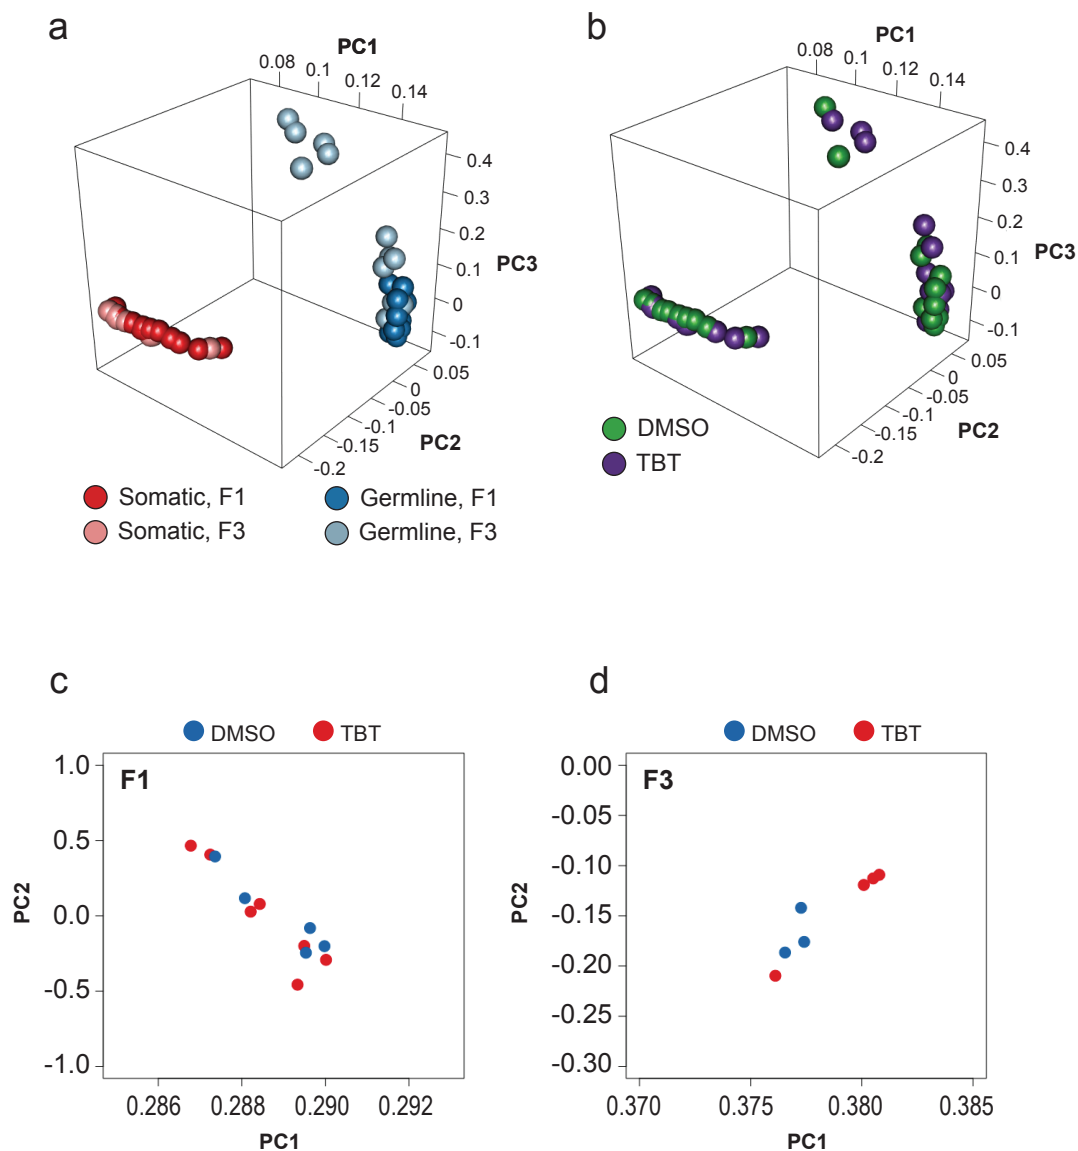

Supplement: s1 [file s1]
